# Supplementary material for: Development and performance of a high-resolution surface wave and storm surge forecast model (COASTLINES-LO): Application to a large lake
Source: Copernicus journal article supplement (doi:10.5194/gmd-2023-151), 2023-10-25
Supplement: Supplementary file 1 [file gmd-2023-151-supplement.pdf]

## Supplementary Information

### *Development and performance of a high-resolution real-time surface wave and storm surge model (COASTLINES-LO): Application to a large lake*

Laura L. Swatridge<sup>a</sup>, Ryan P. Mulligan<sup>a</sup>, Leon Boegman<sup>a</sup>, and Shiliang Shan<sup>b</sup>

<sup>a</sup> Department of Civil Engineering, Queen's University, Kingston, ON, Canada,

<sup>b</sup> Department of Physics and Space Science, Royal Military College of Canada, Kingston, ON, Canada,

| Data Type          | Delivery Method                               | Data Location                                                                                                                                                                                                           | Point Name                                                                 |
|--------------------|-----------------------------------------------|-------------------------------------------------------------------------------------------------------------------------------------------------------------------------------------------------------------------------|----------------------------------------------------------------------------|
| Water Levels (US)  | NOAA CO-OPS data API                          | <a href="https://tidesandcurrents.noaa.gov/stations.html?type=Water+Levels#Great%20Lakes%20-%20Lake%20Ontario">https://tidesandcurrents.noaa.gov/stations.html?type=Water+Levels#Great%20Lakes%20-%20Lake%20Ontario</a> | Cape Vincent, Oswego, Rochester, Olcott Harbour                            |
| Water Levels (CAN) | Canadian Hydrographic Service Web service API | <a href="https://tides.gc.ca/en/stations">https://tides.gc.ca/en/stations</a>                                                                                                                                           | Burlington, Toronto, Cobourg, Kingston, Port Wellar                        |
| Wave/Wind          | Python Web Scraping                           | <a href="https://www.ndbc.noaa.gov/data/realtime2">https://www.ndbc.noaa.gov/data/realtime2</a>                                                                                                                         | NW Lake Ontario, East Lake Ontario, Prince Edward Point, West Lake Ontario |

**Table S1:** Descriptions of available near-real time data that is automatically downloaded as part of the Coastlines-LO workflow, including the data type, web locations, and the method of data delivery for each location.

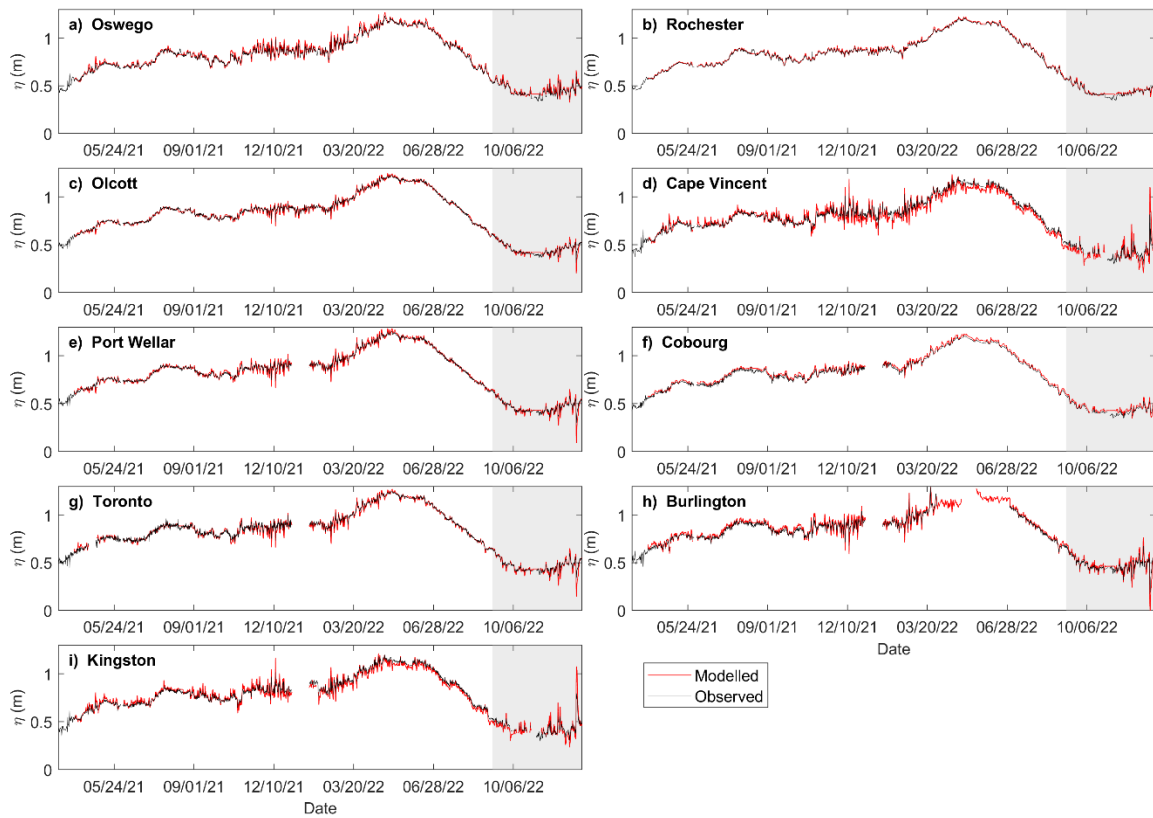

**Figure S1:** Time series of compiled model results (adjusted after each forecast to the correct datum) and observed total water levels at all water level observation points between May 2021 – December 2022. The highlighted area indicates the time-period examined in greater detail in Figure 3.

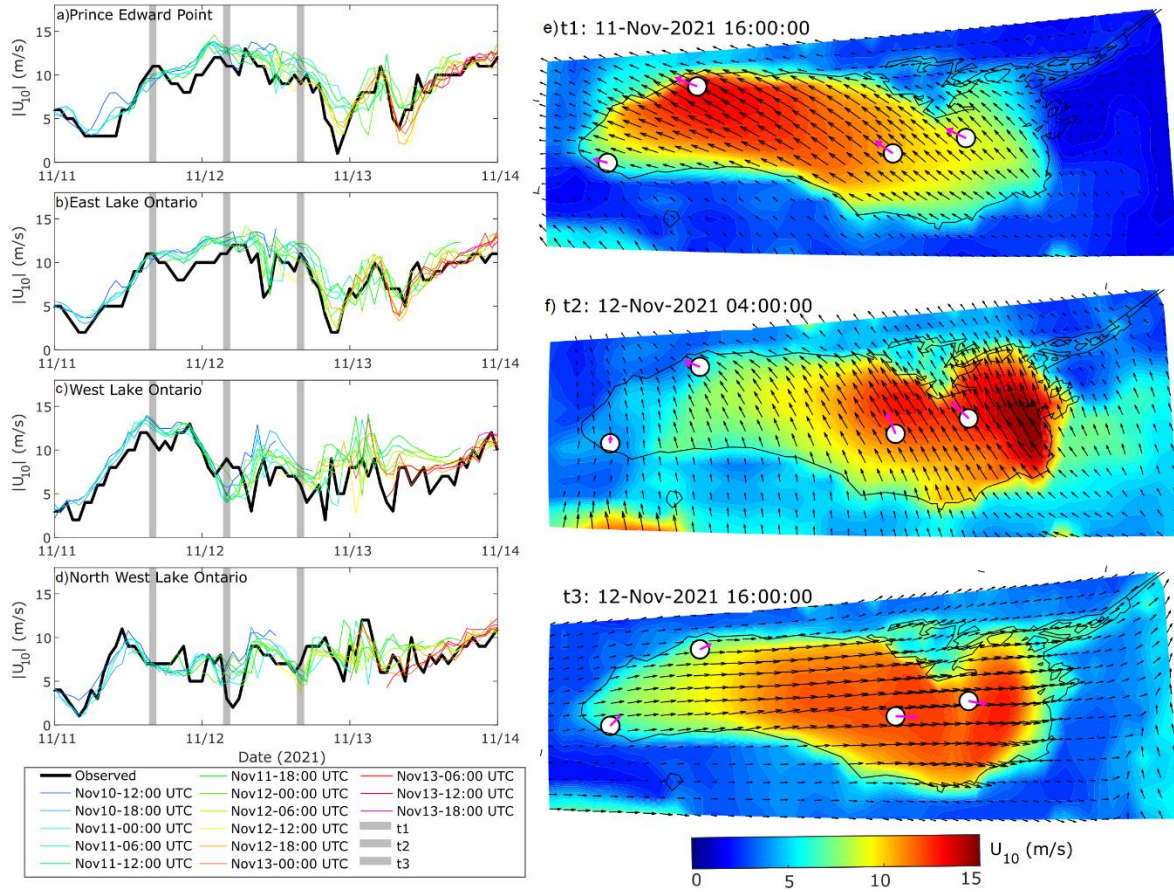

**Figure S2:** Time series of observed wind speeds compared to HRDPS forecasts at wave buoy locations between November 11-14, 2021 (left) and maps of HRDPS wind forecasts shown at select times with every 5<sup>th</sup> vector plotted for clarity (right). Vectors of observed data are plotted in magenta at the location of the buoys.
